# Supplementary material for: Colorectal cancer risk following polypectomy in a multicentre, retrospective, cohort study: an evaluation of the 2020 UK post-polypectomy surveillance guidelines
Source: PubMed Central journal article supplement (PMC8588296; doi:10.1136/gutjnl-2020-323411), 2021-03-05
Supplement: gutjnl-2020-323411supp001.pdf [file gutjnl-2020-323411supp001.pdf]

**Supplementary Table 1. Baseline characteristics by attendance at surveillance (n=21,318)**

|                                | Attended ≥1 surveillance visit |        | Attended no surveillance visits |        | P value <sup>a</sup> |
|--------------------------------|--------------------------------|--------|---------------------------------|--------|----------------------|
|                                | n                              | (%)    | n                               | (%)    |                      |
| Total                          | 11,604                         | (54.4) | 9,714                           | (45.6) |                      |
| Sex                            |                                |        |                                 |        | 0.003                |
| Women                          | 4,804                          | (41.4) | 4,218                           | (43.4) |                      |
| Men                            | 6,800                          | (58.6) | 5,496                           | (56.6) |                      |
| Age at baseline, years         |                                |        |                                 |        | <0.001               |
| <55                            | 2,702                          | (23.3) | 1,596                           | (16.4) |                      |
| 55-64                          | 3,799                          | (32.7) | 2,157                           | (22.2) |                      |
| 65-74                          | 3,780                          | (32.6) | 3,114                           | (32.1) |                      |
| ≥75                            | 1,323                          | (11.4) | 2,847                           | (29.3) |                      |
| No. of PMPs                    |                                |        |                                 |        | <0.001               |
| 1                              | 6,188                          | (53.3) | 6,043                           | (62.2) |                      |
| 2-4                            | 4,438                          | (38.2) | 3,262                           | (33.6) |                      |
| ≥5                             | 978                            | (8.4)  | 409                             | (4.2)  |                      |
| PMP size, mm <sup>b</sup>      |                                |        |                                 |        | <0.001               |
| <10                            | 5,608                          | (48.3) | 5,945                           | (61.2) |                      |
| 10-19                          | 3,591                          | (30.9) | 2,490                           | (25.6) |                      |
| ≥20                            | 2,366                          | (20.4) | 1,259                           | (13.0) |                      |
| Unknown                        | 39                             | (0.3)  | 20                              | (0.2)  |                      |
| Adenoma histology <sup>c</sup> |                                |        |                                 |        | <0.001               |
| Tubular                        | 6,526                          | (56.2) | 6,260                           | (64.4) |                      |
| Tubulovillous                  | 3,849                          | (33.2) | 2,631                           | (27.1) |                      |
| Villous                        | 660                            | (5.7)  | 385                             | (4.0)  |                      |
| Unknown                        | 569                            | (4.9)  | 438                             | (4.5)  |                      |
| Adenoma dysplasia <sup>d</sup> |                                |        |                                 |        | <0.001               |
| Low-grade                      | 9,857                          | (84.9) | 8,735                           | (89.9) |                      |
| High-grade                     | 1,389                          | (12.0) | 759                             | (7.8)  |                      |
| Unknown                        | 358                            | (3.1)  | 220                             | (2.3)  |                      |
| Proximal polyps <sup>e</sup>   |                                |        |                                 |        | 0.005                |
| No                             | 6,195                          | (53.4) | 5,371                           | (55.3) |                      |
| Yes                            | 5,409                          | (46.6) | 4,343                           | (44.7) |                      |
| Year of baseline visit         |                                |        |                                 |        | <0.001               |
| 1984-1999                      | 1,384                          | (11.9) | 673                             | (6.9)  |                      |
| 2000-2004                      | 3,793                          | (32.7) | 2,858                           | (29.4) |                      |
| 2005-2010                      | 6,427                          | (55.4) | 6,183                           | (63.7) |                      |
| Length of baseline visit, days |                                |        |                                 |        | <0.001               |

|                                           |        |               |              |        |
|-------------------------------------------|--------|---------------|--------------|--------|
|                                           | 1      | 7,369 (63.5)  | 6,854 (70.6) |        |
|                                           | 2-90   | 1,732 (14.9)  | 1,303 (13.4) |        |
|                                           | 91-183 | 1,269 (10.9)  | 816 (8.4)    |        |
|                                           | ≥184   | 1,234 (10.6)  | 741 (7.6)    |        |
| Family history of cancer/CRC <sup>f</sup> |        |               |              | <0.001 |
|                                           | No     | 10,430 (89.9) | 9,300 (95.7) |        |
|                                           | Yes    | 1,174 (10.1)  | 414 (4.3)    |        |

PMP=premalignant polyp. CRC=colorectal cancer.

<sup>a</sup>P values were calculated with the chi-square test to compare patients with and without surveillance.

<sup>b</sup>PMP size was defined according to the largest PMP seen at baseline.

<sup>c</sup>Adenoma histology was defined according to the greatest degree of villousness seen at baseline.

<sup>d</sup>Adenoma dysplasia was defined according to the highest grade of dysplasia seen at baseline.

<sup>e</sup>Proximal polyps were defined as those proximal to the descending colon.

<sup>f</sup>Family history of cancer/CRC was defined as 'family history of cancer or CRC reported at an examination before or during visit'. Of cases with a 'family history of cancer', 72% were from a specialist hospital for colorectal diseases and so we assumed these cases had a family history of CRC.

**Supplementary Table 2. Number of surveillance visits and baseline characteristics by risk group (n=21,318)**

|                                | Low-risk patients |        | High-risk patients |        | P value <sup>a</sup> |
|--------------------------------|-------------------|--------|--------------------|--------|----------------------|
|                                | n                 | (%)    | N                  | (%)    |                      |
| Total                          | 15,079            | (70.7) | 6,239              | (29.3) |                      |
| No. of surveillance visits     |                   |        |                    |        | <0.001               |
| 0                              | 7,438             | (49.3) | 2,276              | (36.5) |                      |
| 1                              | 4,199             | (27.8) | 1,704              | (27.3) |                      |
| 2                              | 2,254             | (14.9) | 1,261              | (20.2) |                      |
| ≥3                             | 1,188             | (7.9)  | 998                | (16.0) |                      |
| Sex                            |                   |        |                    |        | <0.001               |
| Women                          | 6,796             | (45.1) | 2,226              | (35.7) |                      |
| Men                            | 8,283             | (54.9) | 4,013              | (64.3) |                      |
| Age at baseline, years         |                   |        |                    |        | <0.001               |
| <55                            | 3,469             | (23.0) | 829                | (13.3) |                      |
| 55-64                          | 4,193             | (27.8) | 1,763              | (28.3) |                      |
| 65-74                          | 4,589             | (30.4) | 2,305              | (36.9) |                      |
| ≥75                            | 2,828             | (18.8) | 1,342              | (21.5) |                      |
| No. of PMPs                    |                   |        |                    |        | <0.001               |
| 1                              | 11,733            | (77.8) | 498                | (8.0)  |                      |
| 2-4                            | 3,346             | (22.2) | 4,354              | (69.8) |                      |
| ≥5                             | 0                 | (0.0)  | 1,387              | (22.2) |                      |
| PMP size, mm <sup>b</sup>      |                   |        |                    |        | <0.001               |
| <10                            | 10,985            | (72.8) | 568                | (9.1)  |                      |
| 10-19                          | 2,981             | (19.8) | 3,100              | (49.7) |                      |
| ≥20                            | 1,086             | (7.2)  | 2,539              | (40.7) |                      |
| Unknown                        | 27                | (0.2)  | 32                 | (0.5)  |                      |
| Adenoma histology <sup>c</sup> |                   |        |                    |        | <0.001               |
| Tubular                        | 10,376            | (68.8) | 2,410              | (38.6) |                      |
| Tubulovillous                  | 3,517             | (23.3) | 2,963              | (47.5) |                      |
| Villous                        | 359               | (2.4)  | 686                | (11.0) |                      |
| Unknown                        | 827               | (5.5)  | 180                | (2.9)  |                      |
| Adenoma dysplasia <sup>d</sup> |                   |        |                    |        | <0.001               |
| Low-grade                      | 13,888            | (92.1) | 4,704              | (75.4) |                      |
| High-grade                     | 740               | (4.9)  | 1,408              | (22.6) |                      |
| Unknown                        | 451               | (3.0)  | 127                | (2.0)  |                      |
| Proximal polyps <sup>e</sup>   |                   |        |                    |        | <0.001               |
| No                             | 9,091             | (60.3) | 2,475              | (39.7) |                      |
| Yes                            | 5,988             | (39.7) | 3,764              | (60.3) |                      |
| Year of baseline visit         |                   |        |                    |        | 0.002                |

|                                           |           |                 |                |        |
|-------------------------------------------|-----------|-----------------|----------------|--------|
|                                           | 1984-1999 | 1,404 (9.3)     | 653 (10.5)     |        |
|                                           | 2000-2004 | 4,792 (31.8)    | 1,859 (29.8)   |        |
|                                           | 2005-2010 | 8,883 (58.9)    | 3,727 (59.7)   |        |
| Length of baseline visit, days            |           |                 |                | <0.001 |
|                                           | 1         | 11,336 (75.2)   | 2,887 (46.3)   |        |
|                                           | 2-90      | 1,750 (11.6)    | 1,285 (20.6)   |        |
|                                           | 91-183    | 1,108 (7.3)     | 977 (15.7)     |        |
|                                           | ≥184      | 885 (5.9)       | 1,090 (17.5)   |        |
| Family history of cancer/CRC <sup>f</sup> |           |                 |                | <0.001 |
|                                           | No        | 13,757 (91.2)   | 5,973 (95.7)   |        |
|                                           | Yes       | 1,322 (8.8)     | 266 (4.3)      |        |
| Follow-up time, years<br>(median [IQR])   |           | 10.3 (7.7-12.9) | 9.6 (6.5-12.1) |        |

PMP=premalignant polyp. CRC=colorectal cancer.

<sup>a</sup>P values were calculated with the chi-square test to compare low-risk and high-risk patients.

<sup>b</sup>PMP size was defined according to the largest PMP seen at baseline.

<sup>c</sup>Adenoma histology was defined according to the greatest degree of villousness seen at baseline.

<sup>d</sup>Adenoma dysplasia was defined according to the highest grade of dysplasia seen at baseline.

<sup>e</sup>Proximal polyps were defined as those proximal to the descending colon.

<sup>f</sup>Family history of cancer/CRC was defined as 'family history of cancer or CRC reported at an examination before or during visit'. Of cases with a 'family history of cancer', 72% were from a specialist hospital for colorectal diseases and so we assumed these cases had a family history of CRC.

**Supplementary Table 3. Long-term incidence of colorectal cancer by number of surveillance visits and baseline characteristics, without excluding colorectal cancers assumed to have arisen from incompletely excised lesions (n=21,318)**

|                                         | n (%)         | No. of person-years | No. of CRCs | Incidence rate per 100,000 person-years (95% CI) | Univariable HR (95% CI) | P value <sup>a</sup> | Multivariable HR (95% CI) <sup>b</sup> | P value <sup>a</sup> |
|-----------------------------------------|---------------|---------------------|-------------|--------------------------------------------------|-------------------------|----------------------|----------------------------------------|----------------------|
| Total                                   | 21,318 (100)  | 210,814             | 393         | 186 (169-206)                                    |                         |                      |                                        |                      |
| No. of surveillance visits <sup>c</sup> |               |                     |             |                                                  |                         | <0.001               |                                        | <0.001               |
| 0                                       | 9,714 (45.6)  | 116,248             | 233         | 200 (176-228)                                    | 1                       |                      | 1                                      |                      |
| 1                                       | 5,903 (27.7)  | 56,923              | 101         | 177 (146-216)                                    | 0.73 (0.57-0.93)        |                      | 0.64 (0.50-0.82)                       |                      |
| 2                                       | 3,515 (16.5)  | 25,058              | 33          | 132 (94-185)                                     | 0.50 (0.34-0.73)        |                      | 0.42 (0.29-0.62)                       |                      |
| ≥3                                      | 2,186 (10.3)  | 12,586              | 26          | 207 (141-303)                                    | 0.67 (0.43-1.04)        |                      | 0.52 (0.33-0.82)                       |                      |
| Sex                                     |               |                     |             |                                                  |                         | 0.64                 |                                        | 0.59                 |
| Women                                   | 9,022 (42.3)  | 92,173              | 168         | 182 (157-212)                                    | 1                       |                      | 1                                      |                      |
| Men                                     | 12,296 (57.7) | 118,641             | 225         | 190 (166-216)                                    | 1.05 (0.86-1.28)        |                      | 1.06 (0.86-1.30)                       |                      |
| Age at baseline, years                  |               |                     |             |                                                  |                         | <0.001               |                                        | <0.001               |
| <55                                     | 4,298 (20.2)  | 51,463              | 37          | 72 (52-99)                                       | 1                       |                      | 1                                      |                      |
| 55-64                                   | 5,956 (27.9)  | 64,938              | 82          | 126 (102-157)                                    | 1.81 (1.23-2.67)        |                      | 1.65 (1.12-2.43)                       |                      |
| 65-74                                   | 6,894 (32.3)  | 65,186              | 165         | 253 (217-295)                                    | 3.79 (2.65-5.43)        |                      | 3.22 (2.25-4.63)                       |                      |
| ≥75                                     | 4,170 (19.6)  | 29,228              | 109         | 373 (309-450)                                    | 6.00 (4.11-8.75)        |                      | 4.45 (3.03-6.52)                       |                      |
| No. of PMPs                             |               |                     |             |                                                  |                         | <0.001               |                                        | 0.004                |
| 1                                       | 12,231 (57.4) | 124,117             | 170         | 137 (118-159)                                    | 1                       |                      | 1                                      |                      |
| 2                                       | 4,714 (22.1)  | 45,601              | 106         | 232 (192-281)                                    | 1.72 (1.35-2.19)        |                      |                                        |                      |
| 3                                       | 2,035 (9.6)   | 19,482              | 46          | 236 (177-315)                                    | 1.75 (1.26-2.43)        |                      | 1.35 (1.08-1.70)                       |                      |
| 4                                       | 951 (4.5)     | 8,856               | 26          | 294 (200-431)                                    | 2.18 (1.44-3.30)        |                      |                                        |                      |
| ≥5                                      | 1,387 (6.5)   | 12,760              | 45          | 353 (263-472)                                    | 2.64 (1.90-3.67)        |                      | 1.76 (1.23-2.53)                       |                      |
| PMP size, mm <sup>d</sup>               |               |                     |             |                                                  |                         | <0.001               |                                        | 0.03                 |
| <10                                     | 11,553 (54.2) | 116,281             | 166         | 143 (123-166)                                    | 1                       |                      | 1                                      |                      |
| 10-19                                   | 6,081 (28.5)  | 59,382              | 110         | 185 (154-223)                                    | 1.30 (1.02-1.65)        |                      | 1.04 (0.80-1.36)                       |                      |
| ≥20                                     | 3,625 (17.0)  | 34,544              | 116         | 336 (280-403)                                    | 2.36 (1.86-2.99)        |                      | 1.52 (1.12-2.05)                       |                      |
| Unknown                                 | 59 (0.3)      | 607                 | 1           | 165 (23-1,169)                                   | 1.12 (0.16-7.98)        |                      | 0.71 (0.10-5.15)                       |                      |
| Adenoma histology <sup>e</sup>          |               |                     |             |                                                  |                         | <0.001               |                                        | <0.001               |
| Tubular                                 | 12,786 (60.0) | 127,882             | 173         | 135 (117-157)                                    | 1                       |                      | 1                                      |                      |
| Tubulovillous                           | 6,480 (30.4)  | 62,187              | 153         | 246 (210-288)                                    | 1.83 (1.47-2.28)        |                      | 1.51 (1.20-1.89)                       |                      |
| Villous                                 | 1,045 (4.9)   | 9,958               | 38          | 382 (278-524)                                    | 2.84 (2.00-4.04)        |                      | 1.80 (1.24-2.62)                       |                      |
| Unknown                                 | 1,007 (4.7)   | 10,787              | 29          | 269 (187-387)                                    | 1.93 (1.30-2.86)        |                      | 2.06 (1.37-3.11)                       |                      |
| Adenoma dysplasia <sup>f</sup>          |               |                     |             |                                                  |                         | <0.001               |                                        | 0.003                |
| Low-grade                               | 18,592 (87.2) | 183,696             | 302         | 164 (147-184)                                    | 1                       |                      | 1                                      |                      |
| High-grade                              | 2,148 (10.1)  | 19,913              | 76          | 382 (305-478)                                    | 2.34 (1.82-3.01)        |                      | 1.63 (1.24-2.14)                       |                      |

|                                           |               |         |     |               |                  |        |                  |        |
|-------------------------------------------|---------------|---------|-----|---------------|------------------|--------|------------------|--------|
| Unknown                                   | 578 (2.7)     | 7,206   | 15  | 208 (125-345) | 1.19 (0.71-2.00) | <0.001 | 1.22 (0.71-2.12) | <0.001 |
| Proximal polyps <sup>e</sup>              |               |         |     |               |                  |        |                  |        |
| No                                        | 11,566 (54.3) | 118,513 | 161 | 136 (116-159) | 1                |        | 1                |        |
| Yes                                       | 9,752 (45.8)  | 92,301  | 232 | 251 (221-286) | 1.88 (1.54-2.30) |        | 1.67 (1.34-2.07) |        |
| Year of baseline visit                    |               |         |     |               |                  | 0.84   |                  | 0.40   |
| 1984-1999                                 | 2,057 (9.7)   | 28,319  | 63  | 222 (174-285) | 1                |        | 1                |        |
| 2000-2004                                 | 6,651 (31.2)  | 74,494  | 143 | 192 (163-226) | 0.94 (0.69-1.30) |        | 0.87 (0.63-1.21) |        |
| 2005-2010                                 | 12,610 (59.2) | 108,001 | 187 | 173 (150-200) | 0.91 (0.66-1.26) |        | 0.80 (0.57-1.11) |        |
| Length of baseline visit, days            |               |         |     |               |                  | <0.001 |                  | 0.003  |
| 1                                         | 14,223 (66.7) | 140,884 | 209 | 148 (130-170) | 1                |        | 1                |        |
| 2-90                                      | 3,035 (14.2)  | 29,429  | 78  | 265 (212-331) | 1.80 (1.39-2.33) |        | 1.62 (1.23-2.12) |        |
| 91-183                                    | 2,085 (9.8)   | 21,071  | 49  | 233 (176-308) | 1.57 (1.15-2.14) |        | 1.33 (0.96-1.84) |        |
| ≥184                                      | 1,975 (9.3)   | 19,430  | 57  | 293 (226-380) | 1.97 (1.47-2.64) |        | 1.49 (1.09-2.04) |        |
| Family history of cancer/CRC <sup>h</sup> |               |         |     |               |                  | 0.12   |                  | 0.11   |
| No                                        | 19,730 (92.6) | 191,764 | 365 | 190 (172-211) | 1                |        | 1                |        |
| Yes                                       | 1,588 (7.5)   | 19,051  | 28  | 147 (101-213) | 0.75 (0.51-1.10) |        | 1.40 (0.94-2.09) |        |

CRC=colorectal cancer. CI=confidence interval. HR=hazard ratio. PMP=premalignant polyp. mm=millimetre.

<sup>a</sup>P values were calculated with the likelihood ratio test.

<sup>b</sup>The multivariable model contained the variables selected in the multivariable model in the main analysis (Table 1), i.e. number of surveillance visits, age, number of PMPs, adenoma histology, adenoma dysplasia, proximal polyps, and length of baseline visit. For these variables, the multivariable HRs were from the final multivariable model and the p values were for inclusion of the variable in the model. For the remaining variables, the multivariable HRs were for if the variable was added as an additional variable to the final multivariable model.

<sup>c</sup>Number of surveillance visits was included as a time-varying covariate, meaning that patients who had surveillance contributed person-years to more than a single category of number of surveillance visits.

<sup>d</sup>PMP size was defined according to the largest PMP seen at baseline.

<sup>e</sup>Adenoma histology was defined according to the greatest degree of villousness seen at baseline.

<sup>f</sup>Adenoma dysplasia was defined according to the highest grade of dysplasia seen at baseline.

<sup>g</sup>Proximal polyps were defined as those proximal to the descending colon.

<sup>h</sup>Family history of cancer/CRC was defined as 'family history of cancer or CRC reported at an examination before or during visit'. Of cases with a 'family history of cancer', 72% were from a specialist hospital for colorectal diseases and so we assumed these cases had a family history of CRC.

**Supplementary Table 4. Cumulative incidence of colorectal cancer and age-sex-standardised incidence ratios in the whole cohort, without excluding colorectal cancers assumed to have arisen from incompletely excised lesions (n=21,318)**

|                                                                                        | n      | (% )  | No. of person-years | No. of CRCs | Incidence rate per 100,000 person-years (95% CI) | At 10 years |                                            | P value <sup>b</sup> | Standardisation                   |                  |  |
|----------------------------------------------------------------------------------------|--------|-------|---------------------|-------------|--------------------------------------------------|-------------|--------------------------------------------|----------------------|-----------------------------------|------------------|--|
|                                                                                        |        |       |                     |             |                                                  | No. of CRCs | Cumulative incidence (95% CI) <sup>a</sup> |                      | No. of expected CRCs <sup>c</sup> | SIR (95% CI)     |  |
| <b>After baseline (without surveillance, censored at any first surveillance visit)</b> |        |       |                     |             |                                                  |             |                                            |                      |                                   |                  |  |
| Total                                                                                  | 21,318 | (100) | 116,248             | 233         | 200 (176-228)                                    | 202         | 2.1% (1.8-2.4)                             |                      | 242                               | 0.96 (0.84-1.09) |  |
| Sex                                                                                    |        |       |                     |             |                                                  |             |                                            | 0.42                 |                                   |                  |  |
| Women                                                                                  | 9,022  | (42)  | 52,431              | 100         | 191 (157-232)                                    | 81          | 1.8% (1.4-2.3)                             |                      | 87                                | 1.16 (0.94-1.41) |  |
| Men                                                                                    | 12,296 | (58)  | 63,816              | 133         | 208 (176-247)                                    | 121         | 2.3% (1.9-2.8)                             |                      | 156                               | 0.85 (0.72-1.01) |  |
| Age at baseline, years                                                                 |        |       |                     |             |                                                  |             |                                            | <0.001               |                                   |                  |  |
| <55                                                                                    | 4,298  | (20)  | 26,718              | 12          | 45 (26-79)                                       | 9           | 0.4% (0.2-0.8)                             |                      | 13                                | 0.93 (0.48-1.63) |  |
| 55-64                                                                                  | 5,956  | (28)  | 32,358              | 41          | 127 (93-172)                                     | 35          | 1.5% (1.0-2.1)                             |                      | 51                                | 0.81 (0.58-1.10) |  |
| 65-74                                                                                  | 6,894  | (32)  | 35,831              | 98          | 274 (224-333)                                    | 85          | 2.7% (2.1-3.4)                             |                      | 100                               | 0.98 (0.80-1.19) |  |
| ≥75                                                                                    | 4,170  | (20)  | 21,341              | 82          | 384 (309-477)                                    | 73          | 3.9% (3.0-5.1)                             |                      | 79                                | 1.04 (0.83-1.30) |  |
| No. of PMPs                                                                            |        |       |                     |             |                                                  |             |                                            | <0.001               |                                   |                  |  |
| 1                                                                                      | 12,231 | (57)  | 72,860              | 108         | 148 (123-179)                                    | 88          | 1.5% (1.2-1.8)                             |                      | 144                               | 0.75 (0.61-0.90) |  |
| 2                                                                                      | 4,714  | (22)  | 24,974              | 62          | 248 (194-318)                                    | 54          | 2.5% (1.8-3.3)                             |                      | 56                                | 1.11 (0.85-1.43) |  |
| 3                                                                                      | 2,035  | (10)  | 9,612               | 25          | 260 (176-385)                                    | 23          | 3.2% (2.0-4.9)                             |                      | 22                                | 1.13 (0.73-1.67) |  |
| 4                                                                                      | 951    | (4)   | 3,971               | 17          | 428 (266-689)                                    | 17          | 6.0% (3.5-10.2)                            |                      | 9                                 | 1.88 (1.09-3.00) |  |
| ≥5                                                                                     | 1,387  | (7)   | 4,830               | 21          | 435 (283-667)                                    | 20          | 4.0% (2.4-6.9)                             |                      | 11                                | 1.92 (1.19-2.94) |  |
| PMP size, mm <sup>d</sup>                                                              |        |       |                     |             |                                                  |             |                                            | <0.001               |                                   |                  |  |
| <10                                                                                    | 11,553 | (54)  | 72,061              | 112         | 155 (129-187)                                    | 95          | 1.6% (1.3-2.0)                             |                      | 145                               | 0.77 (0.64-0.93) |  |
| 10-19                                                                                  | 6,081  | (29)  | 29,408              | 62          | 211 (164-270)                                    | 52          | 2.2% (1.6-3.1)                             |                      | 64                                | 0.97 (0.75-1.25) |  |
| ≥20                                                                                    | 3,625  | (17)  | 14,553              | 58          | 399 (308-516)                                    | 54          | 3.8% (2.8-5.2)                             |                      | 33                                | 1.75 (1.33-2.27) |  |
| Adenoma histology <sup>e</sup>                                                         |        |       |                     |             |                                                  |             |                                            | <0.001               |                                   |                  |  |
| Tubular                                                                                | 12,786 | (60)  | 75,483              | 119         | 158 (132-189)                                    | 102         | 1.6% (1.3-2.0)                             |                      | 153                               | 0.78 (0.64-0.93) |  |
| Tubulovillous                                                                          | 6,480  | (30)  | 30,698              | 79          | 257 (206-321)                                    | 69          | 2.6% (2.0-3.4)                             |                      | 68                                | 1.16 (0.92-1.45) |  |
| Villous                                                                                | 1,045  | (5)   | 4,505               | 20          | 444 (286-688)                                    | 19          | 4.2% (2.5-7.0)                             |                      | 11                                | 1.84 (1.12-2.84) |  |
| Unknown                                                                                | 1,007  | (5)   | 5,562               | 15          | 270 (163-447)                                    | 12          | 3.1% (1.7-5.8)                             |                      | 10                                | 1.45 (0.81-2.40) |  |
| Adenoma dysplasia <sup>f</sup>                                                         |        |       |                     |             |                                                  |             |                                            | <0.001               |                                   |                  |  |
| Low-grade                                                                              | 18,592 | (87)  | 104,400             | 182         | 174 (151-202)                                    | 154         | 1.7% (1.5-2.1)                             |                      | 215                               | 0.85 (0.73-0.98) |  |
| High-grade                                                                             | 2,148  | (10)  | 8,373               | 45          | 537 (401-720)                                    | 43          | 6.0% (4.3-8.4)                             |                      | 20                                | 2.24 (1.63-2.99) |  |
| Unknown                                                                                | 578    | (3)   | 3,475               | 6           | 173 (78-384)                                     | 5           | 2.2% (0.8-5.8)                             |                      | 7                                 | 0.87 (0.32-1.89) |  |
| Proximal polyps <sup>g</sup>                                                           |        |       |                     |             |                                                  |             |                                            | <0.001               |                                   |                  |  |
| No                                                                                     | 11,566 | (54)  | 67,073              | 94          | 140 (114-172)                                    | 83          | 1.6% (1.2-2.0)                             |                      | 133                               | 0.71 (0.57-0.87) |  |

|                                                                                                      |                        |        |       |        |     |     |           |     |      |           |        |     |      |             |  |
|------------------------------------------------------------------------------------------------------|------------------------|--------|-------|--------|-----|-----|-----------|-----|------|-----------|--------|-----|------|-------------|--|
|                                                                                                      | Yes                    | 9,752  | (46)  | 49,174 | 139 | 283 | (239-334) | 119 | 2.7% | (2.2-3.3) |        | 110 | 1.27 | (1.07-1.50) |  |
| No. of APMPs and PMPs                                                                                |                        |        |       |        |     |     |           |     |      |           | <0.001 |     |      |             |  |
|                                                                                                      | No APMPs, 1 PMP        | 7,506  | (35)  | 49,423 | 66  | 134 | (105-170) | 53  | 1.3% | (1.0-1.8) |        | 96  | 0.69 | (0.53-0.88) |  |
|                                                                                                      | No APMPs, 2-4 PMPs     | 3,346  | (16)  | 19,581 | 38  | 194 | (141-267) | 34  | 2.2% | (1.6-3.2) |        | 43  | 0.89 | (0.63-1.22) |  |
|                                                                                                      | No APMPs, ≥5 PMPs      | 461    | (2)   | 1,991  | 3   | 151 | (49-467)  | 3   | 1.4% | (0.4-4.5) |        | 4   | 0.73 | (0.15-2.14) |  |
|                                                                                                      | 1 APMP, no other PMPs  | 4,725  | (22)  | 23,437 | 42  | 179 | (132-242) | 35  | 1.8% | (1.2-2.6) |        | 49  | 0.86 | (0.62-1.16) |  |
|                                                                                                      | ≥1 APMP, ≥2 total PMPs | 5,280  | (25)  | 21,815 | 84  | 385 | (311-477) | 77  | 4.0% | (3.1-5.2) |        | 51  | 1.65 | (1.31-2.04) |  |
| <b>After first surveillance (with one or more surveillance visits, censored at end of follow-up)</b> |                        |        |       |        |     |     |           |     |      |           |        |     |      |             |  |
| Total                                                                                                |                        | 11,604 | (100) | 94,567 | 160 | 169 | (145-198) | 128 | 1.7% | (1.4-2.0) |        | 213 | 0.75 | (0.64-0.88) |  |
| Sex                                                                                                  |                        |        |       |        |     |     |           |     |      |           | 0.97   |     |      |             |  |
|                                                                                                      | Women                  | 4,804  | (41)  | 39,742 | 68  | 171 | (135-217) | 56  | 1.9% | (1.4-2.5) |        | 67  | 1.02 | (0.79-1.29) |  |
|                                                                                                      | Men                    | 6,800  | (59)  | 54,825 | 92  | 168 | (137-206) | 72  | 1.6% | (1.2-2.0) |        | 146 | 0.63 | (0.51-0.77) |  |
| Age at baseline, years                                                                               |                        |        |       |        |     |     |           |     |      |           | <0.001 |     |      |             |  |
|                                                                                                      | <55                    | 2,702  | (23)  | 24,746 | 25  | 101 | (68-150)  | 20  | 0.9% | (0.6-1.4) |        | 19  | 1.30 | (0.84-1.93) |  |
|                                                                                                      | 55-64                  | 3,799  | (33)  | 32,580 | 41  | 126 | (93-171)  | 30  | 1.2% | (0.8-1.8) |        | 69  | 0.60 | (0.43-0.81) |  |
|                                                                                                      | 65-74                  | 3,780  | (33)  | 29,354 | 67  | 228 | (180-290) | 54  | 2.4% | (1.8-3.2) |        | 95  | 0.71 | (0.55-0.90) |  |
|                                                                                                      | ≥75                    | 1,323  | (11)  | 7,887  | 27  | 342 | (235-499) | 24  | 3.9% | (2.5-6.2) |        | 30  | 0.89 | (0.59-1.30) |  |
| No. of PMPs                                                                                          |                        |        |       |        |     |     |           |     |      |           | <0.001 |     |      |             |  |
|                                                                                                      | 1                      | 6,188  | (53)  | 51,257 | 62  | 121 | (94-155)  | 52  | 1.3% | (1.0-1.7) |        | 108 | 0.58 | (0.44-0.74) |  |
|                                                                                                      | 2                      | 2,617  | (23)  | 20,626 | 44  | 213 | (159-287) | 31  | 1.8% | (1.2-2.6) |        | 48  | 0.91 | (0.66-1.23) |  |
|                                                                                                      | 3                      | 1,225  | (11)  | 9,870  | 21  | 213 | (139-326) | 17  | 1.9% | (1.2-3.1) |        | 24  | 0.87 | (0.54-1.33) |  |
|                                                                                                      | 4                      | 596    | (5)   | 4,884  | 9   | 184 | (96-354)  | 6   | 1.2% | (0.5-2.7) |        | 12  | 0.73 | (0.33-1.38) |  |
|                                                                                                      | ≥5                     | 978    | (8)   | 7,930  | 24  | 303 | (203-452) | 22  | 4.0% | (2.5-6.3) |        | 21  | 1.17 | (0.75-1.74) |  |
| PMP size, mm <sup>d</sup>                                                                            |                        |        |       |        |     |     |           |     |      |           | <0.001 |     |      |             |  |
|                                                                                                      | <10                    | 5,608  | (48)  | 44,221 | 54  | 122 | (94-159)  | 44  | 1.3% | (0.9-1.7) |        | 93  | 0.58 | (0.43-0.75) |  |
|                                                                                                      | 10-19                  | 3,591  | (31)  | 29,974 | 48  | 160 | (121-212) | 40  | 1.5% | (1.1-2.1) |        | 70  | 0.69 | (0.51-0.91) |  |
|                                                                                                      | ≥20                    | 2,366  | (20)  | 19,991 | 58  | 290 | (224-375) | 44  | 2.9% | (2.1-4.0) |        | 48  | 1.20 | (0.91-1.55) |  |
| Adenoma histology <sup>e</sup>                                                                       |                        |        |       |        |     |     |           |     |      |           | <0.001 |     |      |             |  |
|                                                                                                      | Tubular                | 6,526  | (56)  | 52,399 | 54  | 103 | (79-135)  | 42  | 0.9% | (0.7-1.3) |        | 114 | 0.48 | (0.36-0.62) |  |
|                                                                                                      | Tubulovillous          | 3,849  | (33)  | 31,489 | 74  | 235 | (187-295) | 62  | 2.5% | (2.0-3.3) |        | 74  | 1.01 | (0.79-1.26) |  |
|                                                                                                      | Villous                | 660    | (6)   | 5,453  | 18  | 330 | (208-524) | 14  | 3.2% | (1.8-5.6) |        | 14  | 1.28 | (0.76-2.02) |  |
|                                                                                                      | Unknown                | 569    | (5)   | 5,225  | 14  | 268 | (159-452) | 10  | 2.6% | (1.4-5.0) |        | 11  | 1.23 | (0.67-2.06) |  |
| Adenoma dysplasia <sup>f</sup>                                                                       |                        |        |       |        |     |     |           |     |      |           | 0.01   |     |      |             |  |
|                                                                                                      | Low-grade              | 9,857  | (85)  | 79,296 | 120 | 151 | (127-181) | 95  | 1.5% | (1.2-1.9) |        | 175 | 0.69 | (0.57-0.82) |  |
|                                                                                                      | High-grade             | 1,389  | (12)  | 11,539 | 31  | 269 | (189-382) | 28  | 2.9% | (2.0-4.3) |        | 29  | 1.06 | (0.72-1.50) |  |
|                                                                                                      | Unknown                | 358    | (3)   | 3,731  | 9   | 241 | (126-464) | 5   | 1.8% | (0.7-4.3) |        | 8   | 1.10 | (0.50-2.09) |  |
| Proximal polyps <sup>g</sup>                                                                         |                        |        |       |        |     |     |           |     |      |           | <0.001 |     |      |             |  |
|                                                                                                      | No                     | 6,195  | (53)  | 51,440 | 67  | 130 | (103-165) | 53  | 1.3% | (1.0-1.7) |        | 109 | 0.61 | (0.48-0.78) |  |
|                                                                                                      | Yes                    | 5,409  | (47)  | 43,126 | 93  | 216 | (176-264) | 75  | 2.2% | (1.7-2.8) |        | 103 | 0.90 | (0.73-1.10) |  |
| No. of APMPs and PMPs                                                                                |                        |        |       |        |     |     |           |     |      |           | <0.001 |     |      |             |  |



|                        |       |      |        |    |     |           |    |                |    |      |             |
|------------------------|-------|------|--------|----|-----|-----------|----|----------------|----|------|-------------|
| No APMPs, 1 PMP        | 3,402 | (29) | 26,997 | 27 | 100 | (69-146)  | 23 | 1.1% (0.7-1.7) | 54 | 0.50 | (0.33-0.73) |
| No APMPs, 2-4 PMPs     | 1,748 | (15) | 13,362 | 17 | 127 | (79-205)  | 11 | 1.0% (0.5-1.9) | 30 | 0.57 | (0.33-0.91) |
| No APMPs, ≥5 PMPs      | 310   | (3)  | 2,566  | 6  | 234 | (105-520) | 6  | 3.1% (1.4-7.2) | 6  | 0.95 | (0.35-2.06) |
| 1 APMP, no other PMPs  | 2,786 | (24) | 24,259 | 35 | 144 | (104-201) | 29 | 1.5% (1.1-2.2) | 54 | 0.65 | (0.46-0.91) |
| ≥1 APMP, ≥2 total PMPs | 3,358 | (29) | 27,382 | 75 | 274 | (218-343) | 59 | 2.6% (2.0-3.4) | 69 | 1.09 | (0.86-1.37) |

CRC=colorectal cancer. CI=confidence interval. SIR=standardised incidence ratio. PMP=premalignant polyp. APMP=advanced PMP.

<sup>a</sup>Cumulative CRC incidence was estimated using the Kaplan-Meier method.

<sup>b</sup>P values were calculated with the log-rank test to compare cumulative CRC incidence among each category of the specified variable.

<sup>c</sup>Numbers of expected CRCs were calculated by multiplying the 5-year age-group and sex-specific observed person-years by the corresponding CRC incidence rates in the general population of England in 2007.

<sup>d</sup>PMP size was defined according to the largest PMP seen at baseline. Patients with PMPs of unknown size are not included in the table; in the analyses without surveillance, there were 59 such patients, of whom one was diagnosed with CRC; and in the analyses with one or more surveillance visits, there were 39 such patients with no CRC cases.

<sup>e</sup>Adenoma histology was defined according to the greatest degree of villousness seen at baseline.

<sup>f</sup>Adenoma dysplasia was defined according to the highest grade of dysplasia seen at baseline.

<sup>g</sup>Proximal polyps were defined as those proximal to the descending colon.

**Supplementary Table 5. Effect of surveillance on colorectal cancer incidence by number of surveillance visits and risk group, without excluding colorectal cancers assumed to have arisen from incompletely excised lesions (n=21,318)**

|                                 | n (%)  |        | No. of person-years | No. of CRCs | Incidence rate per 100,000 person-years (95% CI) |           | Effect of surveillance on CRC incidence <sup>a</sup> |                      |                                        |                      |
|---------------------------------|--------|--------|---------------------|-------------|--------------------------------------------------|-----------|------------------------------------------------------|----------------------|----------------------------------------|----------------------|
|                                 |        |        |                     |             |                                                  |           | Univariable HR (95% CI)                              | P value <sup>b</sup> | Multivariable HR (95% CI) <sup>c</sup> | P value <sup>b</sup> |
| Low-risk patients <sup>d</sup>  | ..     | ..     | ..                  | ..          | ..                                               | ..        | ..                                                   | <0.001               | ..                                     | 0.001                |
| 0 visits                        | 7,438  | (49.3) | 90,451              | 138         | 153                                              | (129-180) | 1                                                    | ..                   | 1                                      | ..                   |
| 1 visit                         | 4,199  | (27.8) | 39,392              | 44          | 112                                              | (83-150)  | 0.56 (0.40-0.80)                                     | ..                   | 0.58 (0.41-0.82)                       | ..                   |
| ≥2 visits                       | 3,442  | (22.8) | 22,654              | 26          | 115                                              | (78-169)  | 0.48 (0.30-0.75)                                     | ..                   | 0.52 (0.33-0.83)                       | ..                   |
| Total                           | 15,079 | (70.7) | 152,497             | 208         | 136                                              | (119-156) | ..                                                   | ..                   | ..                                     | ..                   |
| High-risk patients <sup>d</sup> | ..     | ..     | ..                  | ..          | ..                                               | ..        | ..                                                   | <0.001               | ..                                     | <0.001               |
| 0 visits                        | 2,276  | (36.5) | 25,796              | 95          | 368                                              | (301-450) | 1                                                    | ..                   | 1                                      | ..                   |
| 1 visit                         | 1,704  | (27.3) | 17,531              | 57          | 325                                              | (251-422) | 0.71 (0.51-1.01)                                     | ..                   | 0.69 (0.49-0.98)                       | ..                   |
| ≥2 visits                       | 2,259  | (36.2) | 14,990              | 33          | 220                                              | (157-310) | 0.42 (0.27-0.65)                                     | ..                   | 0.43 (0.28-0.68)                       | ..                   |
| Total                           | 6,239  | (29.3) | 58,318              | 185         | 317                                              | (275-366) | ..                                                   | ..                   | ..                                     | ..                   |

CRC=colorectal cancer. CI=confidence interval. HR=hazard ratio.

<sup>a</sup>Number of surveillance visits was included as a time-varying covariate, meaning that patients who had surveillance contributed person-years to more than a single category of number of surveillance visits.

<sup>b</sup>P values were calculated with the likelihood ratio test.

<sup>c</sup>Multivariable HR adjusted for age, number of premalignant polyps, adenoma histology, adenoma dysplasia, proximal polyps, and length of baseline visit, the characteristics independently associated with CRC incidence in the whole cohort.

<sup>d</sup>High-risk patients were those with ≥2 premalignant polyps of which ≥1 was advanced, ≥5 premalignant polyps, or ≥1 large (≥20mm) non-pedunculated premalignant polyp; low-risk patients had none of these findings.

**Supplementary Table 6. Cumulative incidence of colorectal cancer and age-sex-standardised incidence ratios in low-risk patients, without excluding colorectal cancers assumed to have arisen from incompletely excised lesions (n=15,079)**

|                                                                                        | n      | (%)   | No. of person-years | No. of CRCs | Incidence rate per 100,000 person-years (95% CI) | At 10 years |                                            | P value <sup>b</sup> | Standardisation                   |                  |  |
|----------------------------------------------------------------------------------------|--------|-------|---------------------|-------------|--------------------------------------------------|-------------|--------------------------------------------|----------------------|-----------------------------------|------------------|--|
|                                                                                        |        |       |                     |             |                                                  | No. of CRCs | Cumulative incidence (95% CI) <sup>a</sup> |                      | No. of expected CRCs <sup>c</sup> | SIR (95% CI)     |  |
| <b>After baseline (without surveillance, censored at any first surveillance visit)</b> |        |       |                     |             |                                                  |             |                                            |                      |                                   |                  |  |
| Total                                                                                  | 15,079 | (100) | 90,451              | 138         | 153 (129-180)                                    | 115         | 1.6% (1.3-1.9)                             |                      | 182                               | 0.76 (0.64-0.89) |  |
| Sex                                                                                    |        |       |                     |             |                                                  |             |                                            | 0.44                 |                                   |                  |  |
| Women                                                                                  | 6,796  | (45)  | 42,473              | 61          | 144 (112-185)                                    | 46          | 1.3% (1.0-1.8)                             |                      | 68                                | 0.90 (0.69-1.15) |  |
| Men                                                                                    | 8,283  | (55)  | 47,978              | 77          | 160 (128-201)                                    | 69          | 1.8% (1.4-2.4)                             |                      | 114                               | 0.67 (0.53-0.84) |  |
| Age at baseline, years                                                                 |        |       |                     |             |                                                  |             |                                            | <0.001               |                                   |                  |  |
| <55                                                                                    | 3,469  | (23)  | 22,734              | 7           | 31 (15-65)                                       | 4           | 0.2% (0.1-0.6)                             |                      | 11                                | 0.66 (0.26-1.35) |  |
| 55-64                                                                                  | 4,193  | (28)  | 25,273              | 24          | 95 (64-142)                                      | 20          | 1.1% (0.7-1.7)                             |                      | 40                                | 0.61 (0.39-0.90) |  |
| 65-74                                                                                  | 4,589  | (30)  | 26,926              | 65          | 241 (189-308)                                    | 54          | 2.4% (1.8-3.1)                             |                      | 75                                | 0.87 (0.67-1.10) |  |
| ≥75                                                                                    | 2,828  | (19)  | 15,518              | 42          | 271 (200-366)                                    | 37          | 3.1% (2.1-4.4)                             |                      | 57                                | 0.74 (0.53-1.00) |  |
| No. of PMPs                                                                            |        |       |                     |             |                                                  |             |                                            | 0.16                 |                                   |                  |  |
| 1                                                                                      | 11,733 | (78)  | 70,870              | 100         | 141 (116-172)                                    | 81          | 1.4% (1.1-1.8)                             |                      | 140                               | 0.72 (0.58-0.87) |  |
| 2                                                                                      | 2,184  | (14)  | 13,337              | 24          | 180 (121-268)                                    | 20          | 1.8% (1.1-2.9)                             |                      | 29                                | 0.83 (0.53-1.24) |  |
| 3                                                                                      | 827    | (5)   | 4,645               | 9           | 194 (101-372)                                    | 9           | 2.9% (1.5-5.5)                             |                      | 10                                | 0.86 (0.39-1.64) |  |
| 4                                                                                      | 335    | (2)   | 1,600               | 5           | 313 (130-751)                                    | 5           | 4.7% (1.7-12.9)                            |                      | 3                                 | 1.46 (0.47-3.40) |  |
| PMP size, mm <sup>d</sup>                                                              |        |       |                     |             |                                                  |             |                                            | 0.16                 |                                   |                  |  |
| <10                                                                                    | 10,985 | (73)  | 69,586              | 105         | 151 (125-183)                                    | 88          | 1.6% (1.3-2.0)                             |                      | 140                               | 0.75 (0.61-0.91) |  |
| 10-19                                                                                  | 2,981  | (20)  | 15,651              | 26          | 166 (113-244)                                    | 20          | 1.7% (1.0-2.8)                             |                      | 32                                | 0.80 (0.53-1.18) |  |
| ≥20                                                                                    | 1,086  | (7)   | 5,102               | 6           | 118 (53-262)                                     | 6           | 1.4% (0.6-3.5)                             |                      | 10                                | 0.60 (0.22-1.31) |  |
| Adenoma histology <sup>e</sup>                                                         |        |       |                     |             |                                                  |             |                                            | 0.15                 |                                   |                  |  |
| Tubular                                                                                | 10,376 | (69)  | 64,774              | 88          | 136 (110-167)                                    | 76          | 1.4% (1.1-1.8)                             |                      | 129                               | 0.68 (0.55-0.84) |  |
| Tubulovillous                                                                          | 3,517  | (23)  | 18,944              | 36          | 190 (137-263)                                    | 28          | 2.0% (1.3-3.1)                             |                      | 40                                | 0.90 (0.63-1.25) |  |
| Villous                                                                                | 359    | (2)   | 1,853               | 3           | 162 (52-502)                                     | 2           | 1.1% (0.2-4.5)                             |                      | 4                                 | 0.72 (0.15-2.10) |  |
| Unknown                                                                                | 827    | (5)   | 4,880               | 11          | 225 (125-407)                                    | 9           | 2.7% (1.4-5.5)                             |                      | 9                                 | 1.23 (0.61-2.20) |  |
| Adenoma dysplasia <sup>f</sup>                                                         |        |       |                     |             |                                                  |             |                                            | 0.82                 |                                   |                  |  |
| Low-grade                                                                              | 13,888 | (92)  | 84,243              | 127         | 151 (127-179)                                    | 105         | 1.6% (1.3-1.9)                             |                      | 169                               | 0.75 (0.63-0.89) |  |
| High-grade                                                                             | 740    | (5)   | 3,321               | 6           | 181 (81-402)                                     | 6           | 2.2% (0.9-5.5)                             |                      | 7                                 | 0.81 (0.30-1.77) |  |
| Unknown                                                                                | 451    | (3)   | 2,887               | 5           | 173 (72-416)                                     | 4           | 1.7% (0.6-5.2)                             |                      | 6                                 | 0.86 (0.28-2.00) |  |
| Proximal polyps <sup>g</sup>                                                           |        |       |                     |             |                                                  |             |                                            | <0.001               |                                   |                  |  |
| No                                                                                     | 9,091  | (60)  | 55,867              | 65          | 116 (91-148)                                     | 56          | 1.4% (1.0-1.8)                             |                      | 108                               | 0.60 (0.47-0.77) |  |
| Yes                                                                                    | 5,988  | (40)  | 34,585              | 73          | 211 (168-266)                                    | 59          | 1.9% (1.5-2.5)                             |                      | 75                                | 0.98 (0.77-1.23) |  |

| After first surveillance (with one or more surveillance visits, censored at end of follow-up) |       |       |        |    |     |           |    |      |           |       |     |                  |
|-----------------------------------------------------------------------------------------------|-------|-------|--------|----|-----|-----------|----|------|-----------|-------|-----|------------------|
| Total                                                                                         | 7,641 | (100) | 62,045 | 70 | 113 | (89-143)  | 55 | 1.1% | (0.9-1.5) |       | 131 | 0.54 (0.42-0.68) |
| Sex                                                                                           |       |       |        |    |     |           |    |      |           | 0.09  |     |                  |
| Women                                                                                         | 3,437 | (45)  | 28,298 | 39 | 138 | (101-189) | 32 | 1.6% | (1.1-2.3) |       | 46  | 0.85 (0.60-1.16) |
| Men                                                                                           | 4,204 | (55)  | 33,747 | 31 | 92  | (65-131)  | 23 | 0.8% | (0.5-1.2) |       | 85  | 0.37 (0.25-0.52) |
| Age at baseline, years                                                                        |       |       |        |    |     |           |    |      |           | 0.007 |     |                  |
| <55                                                                                           | 2,086 | (27)  | 18,864 | 13 | 69  | (40-119)  | 10 | 0.6% | (0.3-1.2) |       | 14  | 0.92 (0.49-1.57) |
| 55-64                                                                                         | 2,500 | (33)  | 21,251 | 22 | 104 | (68-157)  | 15 | 0.9% | (0.5-1.6) |       | 44  | 0.50 (0.31-0.76) |
| 65-74                                                                                         | 2,251 | (29)  | 17,221 | 25 | 145 | (98-215)  | 21 | 1.7% | (1.1-2.7) |       | 55  | 0.46 (0.29-0.67) |
| ≥75                                                                                           | 804   | (11)  | 4,710  | 10 | 212 | (114-395) | 9  | 2.4% | (1.1-5.1) |       | 18  | 0.56 (0.27-1.03) |
| No. of PMPs                                                                                   |       |       |        |    |     |           |    |      |           | 0.89  |     |                  |
| 1                                                                                             | 5,893 | (77)  | 48,683 | 53 | 109 | (83-143)  | 44 | 1.2% | (0.9-1.6) |       | 101 | 0.53 (0.39-0.69) |
| 2                                                                                             | 1,096 | (14)  | 8,396  | 11 | 131 | (73-237)  | 7  | 1.0% | (0.5-2.3) |       | 18  | 0.60 (0.30-1.07) |
| 3                                                                                             | 458   | (6)   | 3,464  | 4  | 115 | (43-308)  | 3  | 1.0% | (0.3-3.3) |       | 8   | 0.50 (0.14-1.29) |
| 4                                                                                             | 194   | (3)   | 1,502  | 2  | 133 | (33-532)  | 1  | 0.7% | (0.1-5.0) |       | 4   | 0.54 (0.07-1.96) |
| PMP size, mm <sup>d</sup>                                                                     |       |       |        |    |     |           |    |      |           | 0.43  |     |                  |
| <10                                                                                           | 5,233 | (68)  | 41,134 | 45 | 109 | (82-147)  | 35 | 1.1% | (0.8-1.6) |       | 86  | 0.52 (0.38-0.70) |
| 10-19                                                                                         | 1,674 | (22)  | 14,519 | 14 | 96  | (57-163)  | 11 | 1.0% | (0.5-1.8) |       | 32  | 0.44 (0.24-0.74) |
| ≥20                                                                                           | 717   | (9)   | 6,230  | 11 | 177 | (98-319)  | 9  | 1.9% | (1.0-3.7) |       | 13  | 0.85 (0.42-1.51) |
| Adenoma histology <sup>e</sup>                                                                |       |       |        |    |     |           |    |      |           | 0.02  |     |                  |
| Tubular                                                                                       | 5,016 | (66)  | 39,874 | 33 | 83  | (59-116)  | 24 | 0.7% | (0.5-1.1) |       | 83  | 0.40 (0.27-0.56) |
| Tubulovillous                                                                                 | 1,956 | (26)  | 16,197 | 26 | 161 | (109-236) | 22 | 1.8% | (1.1-2.7) |       | 35  | 0.75 (0.49-1.09) |
| Villous                                                                                       | 217   | (3)   | 1,860  | 2  | 108 | (27-430)  | 1  | 0.7% | (0.1-5.0) |       | 4   | 0.45 (0.05-1.63) |
| Unknown                                                                                       | 452   | (6)   | 4,115  | 9  | 219 | (114-420) | 8  | 2.7% | (1.3-5.4) |       | 9   | 1.03 (0.47-1.95) |
| Adenoma dysplasia <sup>f</sup>                                                                |       |       |        |    |     |           |    |      |           | 0.71  |     |                  |
| Low-grade                                                                                     | 6,912 | (90)  | 55,214 | 63 | 114 | (89-146)  | 49 | 1.1% | (0.8-1.5) |       | 116 | 0.55 (0.42-0.70) |
| High-grade                                                                                    | 462   | (6)   | 4,059  | 3  | 74  | (24-229)  | 3  | 0.9% | (0.3-2.9) |       | 9   | 0.32 (0.07-0.92) |
| Unknown                                                                                       | 267   | (3)   | 2,772  | 4  | 144 | (54-384)  | 3  | 1.6% | (0.5-4.9) |       | 6   | 0.70 (0.19-1.78) |
| Proximal polyps <sup>g</sup>                                                                  |       |       |        |    |     |           |    |      |           | 0.23  |     |                  |
| No                                                                                            | 4,649 | (61)  | 38,524 | 39 | 101 | (74-139)  | 31 | 1.1% | (0.7-1.5) |       | 78  | 0.50 (0.36-0.68) |
| Yes                                                                                           | 2,992 | (39)  | 23,521 | 31 | 132 | (93-187)  | 24 | 1.2% | (0.8-1.9) |       | 53  | 0.59 (0.40-0.83) |

CRC=colorectal cancer. CI=confidence interval. SIR=standardised incidence ratio. PMP=pre-malignant polyp.

Low-risk patients were those without any of the following: ≥2 PMPs of which ≥1 was advanced, ≥5 PMPs, or ≥1 large (≥20mm) non-pedunculated PMP.

<sup>a</sup>Cumulative CRC incidence was estimated using the Kaplan-Meier method.

<sup>b</sup>P values were calculated with the log-rank test to compare cumulative CRC incidence among each category of the specified variable.

<sup>c</sup>Numbers of expected CRCs were calculated by multiplying the 5-year age-group and sex-specific observed person-years by the corresponding CRC incidence rates in the general population of England in 2007.

<sup>d</sup>PMP size was defined according to the largest PMP seen at baseline. Patients with PMPs of unknown size are not included in the table; in the analyses without surveillance, there were 27 such patients, of whom one was diagnosed with CRC; and in the analyses with one or more surveillance visits, there were 17 such patients with no CRC cases.

<sup>e</sup>Adenoma histology was defined according to the greatest degree of villousness seen at baseline.

<sup>f</sup>Adenoma dysplasia was defined according to the highest grade of dysplasia seen at baseline.

<sup>g</sup>Proximal polyps were defined as those proximal to the descending colon.

**Supplementary Table 7. Cumulative incidence of colorectal cancer and age-sex-standardised incidence ratios in high-risk patients, without excluding colorectal cancers assumed to have arisen from incompletely excised lesions (n=6,239)**

|                                                                                        | n     | (%)   | No. of person -years | No. of CRCs | Incidence rate per 100,000 person-years (95% CI) | At 10 years |                                            | Standardisation      |                                   |                  |
|----------------------------------------------------------------------------------------|-------|-------|----------------------|-------------|--------------------------------------------------|-------------|--------------------------------------------|----------------------|-----------------------------------|------------------|
|                                                                                        |       |       |                      |             |                                                  | No. of CRCs | Cumulative incidence (95% CI) <sup>a</sup> | P value <sup>b</sup> | No. of expected CRCs <sup>c</sup> | SIR (95% CI)     |
| <b>After baseline (without surveillance, censored at any first surveillance visit)</b> |       |       |                      |             |                                                  |             |                                            |                      |                                   |                  |
| Total                                                                                  | 6,239 | (100) | 25,796               | 95          | 368 (301-450)                                    | 87          | 3.7% (2.9-4.8)                             |                      | 60                                | 1.58 (1.28-1.94) |
| Sex                                                                                    |       |       |                      |             |                                                  |             |                                            | 0.69                 |                                   |                  |
| Women                                                                                  | 2,226 | (36)  | 9,958                | 39          | 392 (286-536)                                    | 35          | 3.9% (2.7-5.7)                             |                      | 18                                | 2.11 (1.50-2.89) |
| Men                                                                                    | 4,013 | (64)  | 15,839               | 56          | 354 (272-459)                                    | 52          | 3.6% (2.6-5.0)                             |                      | 42                                | 1.35 (1.02-1.75) |
| Age at baseline, years                                                                 |       |       |                      |             |                                                  |             |                                            | <0.001               |                                   |                  |
| <55                                                                                    | 829   | (13)  | 3,983                | 5           | 126 (52-302)                                     | 5           | 1.4% (0.6-3.6)                             |                      | 2                                 | 2.27 (0.74-5.29) |
| 55-64                                                                                  | 1,763 | (28)  | 7,085                | 17          | 240 (149-386)                                    | 15          | 3.1% (1.7-5.6)                             |                      | 11                                | 1.53 (0.89-2.45) |
| 65-74                                                                                  | 2,305 | (37)  | 8,905                | 33          | 371 (263-521)                                    | 31          | 3.7% (2.5-5.5)                             |                      | 25                                | 1.32 (0.91-1.85) |
| ≥75                                                                                    | 1,342 | (22)  | 5,823                | 40          | 687 (504-936)                                    | 36          | 6.1% (4.2-8.8)                             |                      | 22                                | 1.85 (1.32-2.52) |
| No. of PMPs                                                                            |       |       |                      |             |                                                  |             |                                            | 0.53                 |                                   |                  |
| 1                                                                                      | 498   | (8)   | 1,990                | 8           | 402 (201-804)                                    | 7           | 3.0% (1.3-6.8)                             |                      | 5                                 | 1.66 (0.72-3.28) |
| 2                                                                                      | 2,530 | (41)  | 11,638               | 38          | 327 (238-449)                                    | 34          | 3.3% (2.2-4.8)                             |                      | 27                                | 1.41 (1.00-1.93) |
| 3                                                                                      | 1,208 | (19)  | 4,967                | 16          | 322 (197-526)                                    | 14          | 3.4% (1.9-6.2)                             |                      | 12                                | 1.37 (0.79-2.23) |
| 4                                                                                      | 616   | (10)  | 2,371                | 12          | 506 (287-891)                                    | 12          | 7.0% (3.7-13.1)                            |                      | 6                                 | 2.13 (1.10-3.72) |
| ≥5                                                                                     | 1,387 | (22)  | 4,830                | 21          | 435 (283-667)                                    | 20          | 4.0% (2.4-6.9)                             |                      | 11                                | 1.92 (1.19-2.94) |
| PMP size, mm <sup>d</sup>                                                              |       |       |                      |             |                                                  |             |                                            | 0.002                |                                   |                  |
| <10                                                                                    | 568   | (9)   | 2,475                | 7           | 283 (135-593)                                    | 7           | 3.2% (1.4-7.3)                             |                      | 5                                 | 1.32 (0.53-2.72) |
| 10-19                                                                                  | 3,100 | (50)  | 13,757               | 36          | 262 (189-363)                                    | 32          | 2.9% (2.0-4.3)                             |                      | 31                                | 1.15 (0.81-1.59) |
| ≥20                                                                                    | 2,539 | (41)  | 9,451                | 52          | 550 (419-722)                                    | 48          | 5.1% (3.7-7.2)                             |                      | 23                                | 2.25 (1.68-2.95) |
| Adenoma histology <sup>e</sup>                                                         |       |       |                      |             |                                                  |             |                                            | 0.04                 |                                   |                  |
| Tubular                                                                                | 2,410 | (39)  | 10,709               | 31          | 289 (204-412)                                    | 26          | 3.2% (2.1-4.8)                             |                      | 24                                | 1.30 (0.88-1.84) |
| Tubulovillous                                                                          | 2,963 | (47)  | 11,753               | 43          | 366 (271-493)                                    | 41          | 3.5% (2.4-5.0)                             |                      | 28                                | 1.53 (1.11-2.07) |
| Villous                                                                                | 686   | (11)  | 2,652                | 17          | 641 (398-1,031)                                  | 17          | 6.5% (3.7-11.3)                            |                      | 7                                 | 2.54 (1.48-4.06) |
| Unknown                                                                                | 180   | (3)   | 682                  | 4           | 587 (220-1,563)                                  | 3           | 7.0% (1.6-27.9)                            |                      | 1                                 | 2.96 (0.81-7.57) |
| Adenoma dysplasia <sup>f</sup>                                                         |       |       |                      |             |                                                  |             |                                            | <0.001               |                                   |                  |
| Low-grade                                                                              | 4,704 | (75)  | 20,157               | 55          | 273 (209-355)                                    | 49          | 2.5% (1.8-3.5)                             |                      | 46                                | 1.19 (0.90-1.55) |
| High-grade                                                                             | 1,408 | (23)  | 5,052                | 39          | 772 (564-1,057)                                  | 37          | 8.6% (6.0-12.4)                            |                      | 13                                | 3.06 (2.18-4.18) |
| Unknown                                                                                | 127   | (2)   | 587                  | 1           | 170 (24-1,208)                                   | 1           | 5.6% (0.8-33.4)                            |                      | 1                                 | 0.93 (0.02-5.19) |
| Proximal polyps                                                                        |       |       |                      |             |                                                  |             |                                            | 0.009                |                                   |                  |
| No                                                                                     | 2,475 | (40)  | 11,207               | 29          | 259 (180-372)                                    | 27          | 2.6% (1.7-3.9)                             |                      | 25                                | 1.15 (0.77-1.66) |

|                                                                                                          |               |             |        |    |                 |    |                 |      |    |                  |
|----------------------------------------------------------------------------------------------------------|---------------|-------------|--------|----|-----------------|----|-----------------|------|----|------------------|
|                                                                                                          | Yes           | 3,764 (60)  | 14,590 | 66 | 452 (355-576)   | 60 | 4.7% (3.5-6.3)  |      | 35 | 1.90 (1.47-2.41) |
| <b>After first surveillance (with one surveillance visit, censored at any second surveillance visit)</b> |               |             |        |    |                 |    |                 |      |    |                  |
| Total                                                                                                    |               | 3,963 (100) | 17,531 | 57 | 325 (251-422)   | 51 | 4.2% (2.9-6.0)  |      | 43 | 1.34 (1.01-1.73) |
| Sex                                                                                                      |               |             |        |    |                 |    |                 | 0.48 |    |                  |
|                                                                                                          | Women         | 1,367 (34)  | 6,377  | 19 | 298 (190-467)   | 18 | 4.8% (2.7-8.6)  |      | 11 | 1.67 (1.00-2.61) |
|                                                                                                          | Men           | 2,596 (66)  | 11,154 | 38 | 341 (248-468)   | 33 | 3.7% (2.4-5.8)  |      | 31 | 1.21 (0.86-1.67) |
| Age at baseline, years                                                                                   |               |             |        |    |                 |    |                 | 0.02 |    |                  |
|                                                                                                          | <55           | 616 (16)    | 2,846  | 9  | 316 (165-608)   | 8  | 2.8% (1.3-6.2)  |      | 2  | 4.79 (2.19-9.09) |
|                                                                                                          | 55-64         | 1,299 (33)  | 5,609  | 9  | 160 (83-308)    | 9  | 3.0% (1.2-7.7)  |      | 11 | 0.85 (0.39-1.61) |
|                                                                                                          | 65-74         | 1,529 (39)  | 6,684  | 25 | 374 (253-554)   | 21 | 3.7% (2.2-6.2)  |      | 21 | 1.20 (0.77-1.76) |
|                                                                                                          | ≥75           | 519 (13)    | 2,392  | 14 | 585 (347-988)   | 13 | 8.6% (4.6-15.9) |      | 9  | 1.51 (0.82-2.53) |
| No. of PMPs                                                                                              |               |             |        |    |                 |    |                 | 0.98 |    |                  |
|                                                                                                          | 1             | 295 (7)     | 1,308  | 4  | 306 (115-815)   | 4  | 5.0% (1.6-15.0) |      | 3  | 1.20 (0.33-3.07) |
|                                                                                                          | 2             | 1,521 (38)  | 7,130  | 25 | 351 (237-519)   | 22 | 4.6% (2.7-7.8)  |      | 17 | 1.47 (0.95-2.16) |
|                                                                                                          | 3             | 767 (19)    | 3,314  | 9  | 272 (141-522)   | 9  | 3.4% (1.5-7.7)  |      | 8  | 1.12 (0.51-2.13) |
|                                                                                                          | 4             | 402 (10)    | 1,806  | 6  | 332 (149-739)   | 4  | 1.6% (0.5-4.8)  |      | 5  | 1.33 (0.49-2.89) |
|                                                                                                          | ≥5            | 978 (25)    | 3,973  | 13 | 327 (190-564)   | 12 | 5.5% (2.5-11.9) |      | 10 | 1.33 (0.71-2.28) |
| PMP size, mm <sup>d</sup>                                                                                |               |             |        |    |                 |    |                 | 0.62 |    |                  |
|                                                                                                          | <10           | 375 (9)     | 1,637  | 6  | 367 (165-816)   | 6  | 5.6% (2.0-15.2) |      | 4  | 1.54 (0.57-3.36) |
|                                                                                                          | 10-19         | 1,917 (48)  | 8,757  | 24 | 274 (184-409)   | 22 | 3.4% (2.0-5.8)  |      | 21 | 1.15 (0.74-1.71) |
|                                                                                                          | ≥20           | 1,649 (42)  | 7,068  | 27 | 382 (262-557)   | 23 | 4.8% (2.8-8.2)  |      | 18 | 1.52 (1.00-2.22) |
| Adenoma histology <sup>e</sup>                                                                           |               |             |        |    |                 |    |                 | 0.09 |    |                  |
|                                                                                                          | Tubular       | 1,510 (38)  | 6,820  | 13 | 191 (111-328)   | 12 | 2.2% (1.0-4.4)  |      | 16 | 0.81 (0.43-1.39) |
|                                                                                                          | Tubulovillous | 1,893 (48)  | 8,293  | 33 | 398 (283-560)   | 30 | 6.2% (3.9-9.8)  |      | 20 | 1.62 (1.11-2.27) |
|                                                                                                          | Villous       | 443 (11)    | 1,896  | 9  | 475 (247-912)   | 8  | 3.9% (1.9-8.0)  |      | 5  | 1.75 (0.80-3.33) |
|                                                                                                          | Unknown       | 117 (3)     | 522    | 2  | 383 (96-1,533)  | 1  | 1.1% (0.2-7.8)  |      | 1  | 1.77 (0.21-6.38) |
| Adenoma dysplasia <sup>f</sup>                                                                           |               |             |        |    |                 |    |                 | 0.05 |    |                  |
|                                                                                                          | Low-grade     | 2,945 (74)  | 13,079 | 34 | 260 (186-364)   | 30 | 3.8% (2.4-6.0)  |      | 31 | 1.09 (0.76-1.52) |
|                                                                                                          | High-grade    | 927 (23)    | 3,971  | 20 | 504 (325-781)   | 19 | 5.9% (3.2-10.7) |      | 10 | 1.92 (1.17-2.96) |
|                                                                                                          | Unknown       | 91 (2)      | 481    | 3  | 623 (201-1,933) | 2  | 3.8% (0.9-15.3) |      | 1  | 2.75 (0.57-8.04) |
| Proximal polyps                                                                                          |               |             |        |    |                 |    |                 | 0.19 |    |                  |
|                                                                                                          | No            | 1,546 (39)  | 7,157  | 19 | 265 (169-416)   | 18 | 3.3% (1.8-5.9)  |      | 17 | 1.14 (0.68-1.77) |
|                                                                                                          | Yes           | 2,417 (61)  | 10,374 | 38 | 366 (267-503)   | 33 | 4.8% (3.1-7.5)  |      | 26 | 1.46 (1.04-2.01) |
| <b>After second surveillance (with two or more surveillance visits, censored at end of follow-up)</b>    |               |             |        |    |                 |    |                 |      |    |                  |
| Total                                                                                                    |               | 2,259 (100) | 14,990 | 33 | 220 (157-310)   | 26 | 2.3% (1.5-3.5)  |      | 39 | 0.85 (0.58-1.19) |
| Sex                                                                                                      |               |             |        |    |                 |    |                 | 0.50 |    |                  |
|                                                                                                          | Women         | 741 (33)    | 5,067  | 10 | 197 (106-367)   | 8  | 2.1% (1.0-4.3)  |      | 9  | 1.07 (0.51-1.97) |
|                                                                                                          | Men           | 1,518 (67)  | 9,923  | 23 | 232 (154-349)   | 18 | 2.5% (1.5-4.2)  |      | 30 | 0.78 (0.49-1.16) |
| Age at baseline, years                                                                                   |               |             |        |    |                 |    |                 | 0.04 |    |                  |
|                                                                                                          | <55           | 402 (18)    | 3,036  | 3  | 99 (32-306)     | 3  | 1.6% (0.5-5.1)  |      | 3  | 0.96 (0.20-2.79) |

|                                |               |       |      |        |    |     |             |    |      |            |      |    |      |             |
|--------------------------------|---------------|-------|------|--------|----|-----|-------------|----|------|------------|------|----|------|-------------|
|                                | 55-64         | 834   | (37) | 5,719  | 10 | 175 | (94-325)    | 6  | 1.2% | (0.5-3.0)  |      | 14 | 0.72 | (0.35-1.32) |
|                                | 65-74         | 871   | (39) | 5,450  | 17 | 312 | (194-502)   | 14 | 3.6% | (2.0-6.4)  |      | 19 | 0.91 | (0.53-1.45) |
|                                | ≥75           | 152   | (7)  | 785    | 3  | 382 | (123-1,185) | 3  | 4.9% | (1.2-18.4) |      | 3  | 0.93 | (0.19-2.73) |
| No. of PMPs                    |               |       |      |        |    |     |             |    |      |            | 0.30 |    |      |             |
|                                | 1             | 171   | (8)  | 1,266  | 5  | 395 | (164-949)   | 4  | 3.2% | (1.2-8.8)  |      | 3  | 1.51 | (0.49-3.53) |
|                                | 2             | 793   | (35) | 5,100  | 8  | 157 | (78-314)    | 5  | 1.3% | (0.5-3.4)  |      | 13 | 0.63 | (0.27-1.24) |
|                                | 3             | 464   | (21) | 3,092  | 8  | 259 | (129-517)   | 6  | 2.1% | (0.9-5.0)  |      | 8  | 0.99 | (0.43-1.95) |
|                                | 4             | 242   | (11) | 1,576  | 1  | 63  | (9-450)     | 1  | 0.8% | (0.1-5.2)  |      | 4  | 0.24 | (0.01-1.35) |
|                                | ≥5            | 589   | (26) | 3,957  | 11 | 278 | (154-502)   | 10 | 4.1% | (2.1-8.1)  |      | 11 | 1.02 | (0.51-1.83) |
| PMP size, mm <sup>d</sup>      |               |       |      |        |    |     |             |    |      |            | 0.38 |    |      |             |
|                                | <10           | 210   | (9)  | 1,450  | 3  | 207 | (67-641)    | 3  | 2.6% | (0.8-8.7)  |      | 4  | 0.81 | (0.17-2.37) |
|                                | 10-19         | 1,063 | (47) | 6,698  | 10 | 149 | (80-277)    | 8  | 1.2% | (0.6-2.4)  |      | 17 | 0.58 | (0.28-1.07) |
|                                | ≥20           | 968   | (43) | 6,692  | 20 | 299 | (193-463)   | 15 | 3.4% | (1.9-5.8)  |      | 18 | 1.14 | (0.70-1.76) |
| Adenoma histology <sup>e</sup> |               |       |      |        |    |     |             |    |      |            | 0.12 |    |      |             |
|                                | Tubular       | 854   | (38) | 5,704  | 8  | 140 | (70-280)    | 7  | 1.2% | (0.5-2.6)  |      | 15 | 0.55 | (0.24-1.08) |
|                                | Tubulovillous | 1,075 | (48) | 6,999  | 15 | 214 | (129-355)   | 11 | 2.0% | (1.0-3.8)  |      | 18 | 0.82 | (0.46-1.35) |
|                                | Villous       | 259   | (11) | 1,697  | 7  | 412 | (197-865)   | 7  | 6.9% | (3.1-15.1) |      | 5  | 1.55 | (0.62-3.19) |
|                                | Unknown       | 71    | (3)  | 589    | 3  | 509 | (164-1,578) | 1  | 2.9% | (0.4-19.1) |      | 2  | 1.99 | (0.41-5.83) |
| Adenoma dysplasia <sup>f</sup> |               |       |      |        |    |     |             |    |      |            | 0.79 |    |      |             |
|                                | Low-grade     | 1,681 | (74) | 11,004 | 23 | 209 | (139-315)   | 19 | 2.0% | (1.3-3.3)  |      | 28 | 0.82 | (0.52-1.22) |
|                                | High-grade    | 525   | (23) | 3,509  | 8  | 228 | (114-456)   | 7  | 3.5% | (1.6-7.8)  |      | 9  | 0.85 | (0.37-1.67) |
|                                | Unknown       | 53    | (2)  | 477    | 2  | 419 | (105-1,675) | 0  | -    |            |      | 1  | 1.50 | (0.18-5.41) |
| Proximal polyps                |               |       |      |        |    |     |             |    |      |            | 0.17 |    |      |             |
|                                | No            | 853   | (38) | 5,758  | 9  | 156 | (81-300)    | 6  | 1.2% | (0.5-2.8)  |      | 15 | 0.62 | (0.28-1.18) |
|                                | Yes           | 1,406 | (62) | 9,232  | 24 | 260 | (174-388)   | 20 | 3.0% | (1.8-4.9)  |      | 24 | 0.98 | (0.63-1.46) |

CRC=colorectal cancer. CI=confidence interval. SIR=standardised incidence ratio. PMP=pre-malignant polyp.

High-risk patients were those with ≥2 PMPs of which ≥1 was advanced, ≥5 PMPs, or ≥1 large (≥20mm) non-pedunculated PMP.

<sup>a</sup>Cumulative CRC incidence was estimated using the Kaplan-Meier method.

<sup>b</sup>P values were calculated with the log-rank test to compare cumulative CRC incidence among each category of the specified variable.

<sup>c</sup>Numbers of expected CRCs were calculated by multiplying the 5-year age-group and sex-specific observed person-years by the corresponding CRC incidence rates in the general population of England in 2007.

<sup>d</sup>PMP size was defined according to the largest PMP seen at baseline. Patients with PMPs of unknown size are not included in the table; in the analyses without surveillance, there were 32 such patients with no CRC cases; in the analyses with one surveillance visit, there were 22 such patients with no CRC cases; and in the analyses with two or more surveillance visits, there were 18 such patients with no CRC cases.

<sup>e</sup>Adenoma histology was defined according to the greatest degree of villousness seen at baseline.

<sup>f</sup>Adenoma dysplasia was defined according to the highest grade of dysplasia seen at baseline.
